# Supplementary material
Source: publisher figshare collection journal article supplement (https://karger.figshare.com/articles/dataset/_/5124739)
Supplement: Supplementary file 1 [file 1]

| Species                        | References for female body masses                                           | References for male body masses                                          |
|--------------------------------|-----------------------------------------------------------------------------|--------------------------------------------------------------------------|
| <i>Acrobates pygmaeus</i>      | Woodside [1995]                                                             | Woodside [1995]                                                          |
| <i>Aepyprymnus rufescens</i>   | Dennis and Johnson [1995]                                                   | Dennis and Johnson [1995]                                                |
| <i>Antechinomys laniger</i>    | Valente [1995]                                                              | Valente [1995]                                                           |
| <i>Antechinus agilis</i>       | Dickman [1995a]                                                             | Dickman [1995a]                                                          |
| <i>Antechinus bellus</i>       | Calaby [1995a]                                                              | Calaby [1995a]                                                           |
| <i>Antechinus flavipes</i>     | Van Dyck [1995a]                                                            | Van Dyck [1995a]                                                         |
| <i>Antechinus leo</i>          | Leung [1995]                                                                | Leung [1995]                                                             |
| <i>Antechinus melanurus</i>    | Flannery [1990]                                                             | Flannery [1990]                                                          |
| <i>Antechinus minimus</i>      | Wainer and Wilson [1995]                                                    | Wainer and Wilson [1995]                                                 |
| <i>Antechinus naso</i>         | Flannery [1990]                                                             | Flannery [1990]                                                          |
| <i>Antechinus stuartii</i>     | Braithwaite [1995b]<br>Fisher et al. [2011], Burnett and<br>Crowther [2008] | Braithwaite [1995b]<br>Fisher et al. [2011], Burnett and Crowther [2008] |
| <i>Antechinus subtropicus</i>  | Dickman [1995c]                                                             | Dickman [1995c]                                                          |
| <i>Antechinus swainsonii</i>   | Rose and Johnson [1995]                                                     | Rose and Johnson [1995]                                                  |
| <i>Bettongia gaimardi</i>      | Burbidge [1995b]                                                            | Burbidge [1995b]                                                         |
| <i>Bettongia lesueur</i>       | Christensen [1995a]                                                         | Christensen [1995a]                                                      |
| <i>Bettongia penicillata</i>   | Winter and Johnson [1995]                                                   | Winter and Johnson [1995]                                                |
| <i>Bettongia tropica</i>       | Broome [1995]                                                               | Broome [1995]                                                            |
| <i>Burramys parvus</i>         | Kirsch and Waller [1979]                                                    | Kirsch and Waller [1979]                                                 |
| <i>Caenolestes fuliginosus</i> | Silva and Downing [1995]                                                    | Bergallo and Cerqueira [1994]                                            |
| <i>Caluromys derbianus</i>     | Silva and Downing [1995]                                                    | Silva and Downing [1995]                                                 |
| <i>Caluromys philander</i>     | Atherton & Haffenden 1995                                                   | Atherton & Haffenden 1995                                                |
| <i>Cercartetus caudatus</i>    | Smith [1995b]                                                               | Smith [1995b]                                                            |
| <i>Cercartetus concinnus</i>   | Green [1995]                                                                | Green [1995]                                                             |
| <i>Cercartetus lepidus</i>     | Turner and Ward [1995]                                                      | Turner and Ward [1995]                                                   |
| <i>Cercartetus nanus</i>       | Johnson and Burbidge [1995b]                                                | Johnson and Burbidge [1995b]                                             |
| <i>Chaeropus ecaudatus</i>     | Flannery [1990]                                                             | Flannery [1990]                                                          |
| <i>Dactylonax palpator</i>     | Flannery [1990]                                                             | Flannery [1990]                                                          |
| <i>Dactylopsila tatei</i>      | Handasyde [2008]                                                            | Handasyde [2008]                                                         |
| <i>Dactylopsila trivirgata</i> | Woolley [2008]                                                              | Woolley [2008]                                                           |
| <i>Dasyercus cristicauda</i>   | Woolley [1995b]                                                             | Woolley [1995b]                                                          |
| <i>Dasykaluta rosamondae</i>   | Aslin and Lim [1995]                                                        | Aslin and Lim [1995]                                                     |
| <i>Dasyuroides byrnei</i>      | Flannery [1990]                                                             | Flannery [1990]                                                          |
| <i>Dasyurus albopunctatus</i>  | Serena and Soderquist [1995]                                                | Serena and Soderquist [1995]                                             |
| <i>Dasyurus geoffroii</i>      | Braithwaite and Begg [1995]                                                 | Braithwaite and Begg [1995]                                              |
| <i>Dasyurus hallucatus</i>     | Edgar and Belcher [1995]                                                    | Edgar and Belcher [1995]                                                 |
| <i>Dasyurus maculatus</i>      | Godsell [1995]                                                              | Godsell [1995]                                                           |
| <i>Dasyurus viverrinus</i>     | Martin and Johnson [1995]                                                   | Martin and Johnson [1995]                                                |
| <i>Dendrolagus bennetianus</i> | Flannery et al. [1996]                                                      | Flannery et al. [1996]                                                   |
| <i>Dendrolagus dorianus</i>    | Flannery [1990]                                                             | Flannery [1990]                                                          |
| <i>Dendrolagus goodfellowi</i> | Flannery et al. [1996]                                                      | Flannery et al. [1996]                                                   |
| <i>Dendrolagus inustus</i>     | Johnson [1995d], Newell [1999]                                              | Johnson [1995d], Newell [1999]                                           |
| <i>Dendrolagus lumholtzi</i>   | Flannery et al. [1996]                                                      | Flannery et al. [1996]                                                   |
| <i>Dendrolagus matschiei</i>   | Flannery [1990]                                                             | Flannery [1990]                                                          |
| <i>Dendrolagus scottae</i>     | Flannery [1990]                                                             | Flannery [1990]                                                          |
| <i>Dendrolagus spadix</i>      | Flannery [1990]                                                             | Flannery [1990]                                                          |
| <i>Dendrolagus ursinus</i>     | Flannery [1990]                                                             | Flannery [1990]                                                          |

|                                          |                                 |                                 |
|------------------------------------------|---------------------------------|---------------------------------|
| <i>Didelphis marsupialis californica</i> | Silva and Downing [1995]        | Silva and Downing [1995]        |
| <i>Didelphis virginiana</i>              | Edmunds and Goertz [1978]       | Edmunds and Goertz [1978]       |
| <i>Distoechurus pennatus</i>             |                                 | Flannery [1990]                 |
| <i>Dorcopsis atrata</i>                  | Flannery [1990]                 |                                 |
| <i>Dorcopsis hageni</i>                  |                                 | Flannery [1990]                 |
| <i>Dorcopsis luctuosa</i>                | Flannery [1990]                 |                                 |
| <i>Dorcopsis muelleri</i>                | Flannery [1990]                 | Flannery [1990]                 |
| <i>Dorcopsulus macleayi</i>              | Flannery [1990]                 |                                 |
| <i>Dorcopsulus vanheurni</i>             | Flannery [1990]                 | Flannery [1990]                 |
| <i>Dromciops gliroides</i>               | Hershkovitz [1999]              | Hershkovitz [1999]              |
| <i>Echymipera clara</i>                  | Flannery [1990]                 | Flannery [1990]                 |
| <i>Echymipera kalubu</i>                 | Hyde et al. [1984]              | Hyde et al. [1984]              |
| <i>Echymipera rufescens</i>              | Gordon [1995a]                  | Gordon [1995a]                  |
| <i>Gymnobelideus leadbeateri</i>         | Smith [1995a]                   | Smith [1995a]                   |
| <i>Hemibelideus lemuroides</i>           | Winter and Goudberg [1995a]     | Winter and Goudberg [1995a]     |
| <i>Isoodon macrourus</i>                 | Gordon [1995b]                  | Gordon [1995b]                  |
| <i>Isoodon besulus</i>                   | Braithwaite [1995a]             | Braithwaite [1995a]             |
| <i>Lagorchestes conspicillatus</i>       | Burbidge and Johnson [1995]     | Burbidge and Johnson [1995]     |
| <i>Lagorchestes hirsutus</i>             | Johnson and Burbidge [1995a]    | Johnson and Burbidge [1995a]    |
| <i>Lagorchestes leporides</i>            |                                 | Jones et al. [2009]             |
| <i>Lagostrophus fasciatus</i>            | Prince [1995]                   | Prince [1995]                   |
| <i>Lasiiorhinus latifrons</i> Ar         | Wells [1995]                    | Wells [1995]                    |
| <i>Macropus agilis</i>                   | Merchant [1995a]                | Merchant [1995a]                |
| <i>Macropus antilopinus</i>              | Calaby [1995b]                  | Calaby [1995b]                  |
| <i>Macropus dorsalis</i>                 | Kirkpatrick [1995]              | Kirkpatrick [1995]              |
| <i>Macropus eugenii</i>                  | Smith and Hinds [1995]          | Smith and Hinds [1995]          |
| <i>Macropus fuliginosus</i>              | Poole [1995a]                   | Poole [1995a]                   |
| <i>Macropus giganteus</i>                | Poole [1995b]                   | Poole [1995b]                   |
| <i>Macropus greyi</i>                    |                                 | Jones et al. [2009]             |
| <i>Macropus irma</i>                     | Christensen [1995b]             | Christensen [1995b]             |
| <i>Macropus parma</i>                    | Maynes [1995]                   | Maynes [1995]                   |
| <i>Macropus parryi</i>                   |                                 | Johnson [1995c]                 |
| <i>Macropus robustus</i>                 | Poole [1995c]                   | Poole [1995c]                   |
| <i>Macropus rufogriseus</i>              | Calaby [1995c]                  | Calaby [1995c]                  |
| <i>Macropus rufus</i>                    | Newsome [1995]                  | Newsome [1995]                  |
| <i>Macrotis lagotis</i>                  | Johnson [1995a]                 | Johnson [1995a]                 |
| <i>Macrotis leucura</i>                  | Johnson [1995a]                 | Johnson [1995a]                 |
| <i>Marmosa mexicana</i>                  | Alonso-Mejia and Medelin [1992] | Alonso-Mejia and Medelin [1992] |
| <i>Marmosa murinama dierensis</i>        | Silva and Downing [1995]        | Silva and Downing [1995]        |
| <i>Marmosa robinsoni</i>                 | Silva and Downing [1995]        | Silva and Downing [1995]        |
| <i>Marmosa rubra</i>                     | Harder and Fleck [1997]         | Harder and Fleck [1997]         |
| <i>Metachirus nudicaudatus</i>           | Harder and Fleck [1997]         | Harder and Fleck [1997]         |
| <i>Microperoryctes longicauda</i>        | Flannery [1990]                 | Flannery [1990]                 |
| <i>Monodelphis brevicaudata</i>          | Silva and Downing [1995]        | Silva and Downing [1995]        |
| <i>Murexia longicaudata</i>              | Woolley [2003]                  | Woolley [2003]                  |

|                               |                             |                             |
|-------------------------------|-----------------------------|-----------------------------|
| <i>Murexia rothschildi</i>    | Woolley [2003]              | Woolley [2003]              |
| <i>Myoictis melas</i>         | Woolley [2003]              | Woolley [2003]              |
| <i>Myrmecobius fasciatus</i>  | Friend [1995]               | Friend [1995]               |
| <i>Neophascogale lorentzi</i> | Flannery [1990]             | Flannery [1990]             |
| <i>Ningauai ridei</i>         | McKenzie and Dickman [1995] | McKenzie and Dickman [1995] |
| <i>Ningauai yvonneae</i>      | Bos and Carthew [2001]      | Bos and Carthew [2001]      |
| <i>Notoryctes caurinus</i>    | Benshemesh [2008]           | Benshemesh [2008]           |
| <i>Onychogalea fraenata</i>   | Fisher and Lara [1999]      | Fisher and Lara [1999]      |
| <i>Onychogalea lunata</i>     |                             | Jones et al. [2009]         |
| <i>Onychogalea unguifera</i>  | Ingleby and Gordon [1995]   | Ingleby and Gordon [1995]   |
| <i>Parantechinus apicalis</i> | Woolley [1995d]             | Woolley [1995d]             |
| <i>Parantechinus bilarni</i>  | Woolley and Begg [1995]     | Woolley and Begg [1995]     |
| <i>Perameles bougainville</i> | Friend and Burbidge [1995]  | Friend and Burbidge [1995]  |
| <i>Perameles gunnii</i>       | Seebeck [1995]              | Seebeck [1995]              |
| <i>Perameles nasuta</i>       | Lyne [1964]                 | Lyne [1964]                 |
| <i>Peroryctes raffrayana</i>  | Flannery [1990]             | Flannery [1990]             |
| <i>Petauroides volans</i>     | McKay [1995]                | McKay [1995]                |
| <i>Petaurus australis</i>     | Silva and Downing [1995]    | Silva and Downing [1995]    |
| <i>Petaurus breviceps</i>     | Suckling [1995b]            | Suckling [1995b]            |
| <i>Petaurus norfolcensis</i>  | Suckling [1995a]            | Suckling [1995a]            |
| <i>Petrogale assimilis</i>    | Eldridge and Close [1995a]  | Eldridge and Close [1995a]  |
| <i>Petrogale brachyotis</i>   | Sharman et al. [1995a]      | Sharman et al. [1995a]      |
| <i>Petrogale concinna</i>     | Sanson [1995]               | Sanson [1995]               |
| <i>Petrogale godmani</i>      | Eldridge and Close [1995b]  | Eldridge and Close [1995b]  |
| <i>Petrogale herberti</i>     | Eldridge and Close [1995d]  | Eldridge and Close [1995d]  |
| <i>Petrogale inornata</i>     | Eldridge and Close [1995f]  | Eldridge and Close [1995f]  |
| <i>Petrogale lateralis</i>    | Eldridge and Close [1995e]  | Eldridge and Close [1995e]  |
| <i>Petrogale mareeba</i>      | Eldridge and Close [1995c]  | Eldridge and Close [1995c]  |
| <i>Petrogale penicillata</i>  | Eldridge and Close [1995a]  | Eldridge and Close [1995a]  |
| <i>Petrogale persephone</i>   | Sharman et al. [1995b]      | Sharman et al. [1995b]      |
| <i>Petrogale xanthopus</i>    | Sharman et al. [1995c]      | Sharman et al. [1995c]      |
| <i>Petropseudes dahli</i>     | Kerle and Winter [1995]     | Kerle and Winter [1995]     |
| <i>Phalanger carmelitae</i>   | Flannery [1990]             | Flannery [1990]             |
| <i>Phalanger gymnotis</i>     | Flannery [1990]             | Flannery [1990]             |
| <i>Phalanger mimicus</i>      | Winter and Leung [2008]     | Winter and Leung [2008]     |
| <i>Phalanger lulullae</i>     | Norris [1999]               | Norris [1999]               |
| <i>Phalanger orientalis</i>   | Flannery [1990]             | Flannery [1990]             |
| <i>Phalanger ornatus</i>      | White [2004]                |                             |
| <i>Phalanger sericeus</i>     | Flannery [1990]             | Flannery [1990]             |
| <i>Phalanger vestitus</i>     | Flannery [1990]             | Flannery [1990]             |
| <i>Phascogale calura</i>      | Bradley [1995]              | Bradley [1995]              |
| <i>Phascogale tapoatafa</i>   | Soderquist [1995]           | Soderquist [1995]           |
| <i>Phascolarctos cinereus</i> | Martin and Handasyde [1995] | Martin and Handasyde [1995] |
| <i>Phascolosorex dorsalis</i> | Woolley [2003]              | Woolley [2003]              |
| <i>Philander opossum</i>      | Silva and Downing [1995]    | Silva and Downing [1995]    |
| <i>Planigale gilesi</i>       | Read [1995a]                | Read [1995a]                |
| <i>Planigale ingrami</i>      | Van Dyck [1995b]            | Van Dyck [1995b]            |
| <i>Planigale maculata</i>     | Redhead [1995]              | Redhead [1995]              |

|                                        |                             |                                                                |
|----------------------------------------|-----------------------------|----------------------------------------------------------------|
| <i>Planigale novaeguineae</i>          | Flannery [1990]             |                                                                |
| <i>Planigale tenuirostris</i>          | Read [1995b]                | Read [1995b]                                                   |
| <i>Potorous platyops</i>               |                             | Jones et al. [2009]                                            |
| <i>Potorous tridactylus</i>            | Johnston [1995]             | Johnston [1995]                                                |
| <i>Pseudantechinus roryi</i>           | Flannery [1990]             | Flannery [1990]                                                |
| <i>Pseudantechinus macdonnellensis</i> | Woolley [1995a]             | Woolley [1995a]                                                |
| <i>Pseudocheirus occidentalis</i>      | Jones [1995a]               | Jones [1995a]                                                  |
| <i>Pseudocheirus peregrinus</i>        | McKay and Ong [2008]        | McKay and Ong [2008]                                           |
| <i>Pseudocheirops albertisii</i>       | Flannery [1990]             | Flannery [1990]                                                |
| <i>Pseudocheirops archeri</i>          | Winter and Goudberg [1995c] | Winter and Goudberg [1995c]                                    |
| <i>Pseudocheirops corinnae</i>         | Flannery [1990]             | Flannery [1990]                                                |
| <i>Pseudocheirops coronatus</i>        | Flannery [1990]             | Flannery [1990]                                                |
| <i>Pseudocheirops cupreus</i>          | Flannery [1990]             | Flannery [1990]                                                |
| <i>Pseudochirulus canescens</i>        | Flannery [1990]             | Flannery [1990]                                                |
| <i>Pseudochirulus carolli</i>          |                             |                                                                |
| <i>Pseudochirulus forbesi</i>          | Flannery [1995]             | Flannery [1995]                                                |
| <i>Pseudochirulus herbertensis</i>     | Winter and Goudberg [1995b] | Winter and Goudberg [1995b]                                    |
| <i>Pseudochirulus mayeri</i>           | Flannery [1990]             | Flannery [1990]                                                |
| <i>Pseudochirulus schlegelli</i>       | Flannery [1990]             |                                                                |
| <i>Rhyncholestes raphanurus</i>        |                             | Pine [1979; Redford and Eisenberg [1992] Redford et al. [1993] |
| <i>Sarcophilus harrisii</i>            | Jones [1995b]               | Jones [1995b]                                                  |
| <i>Setonix brachyurus</i>              | Kitchener [1995]            | Kitchener [1995]                                               |
| <i>Sminthopsis bindi</i>               |                             | Flannery [1990]                                                |
| <i>Sminthopsis crassicaudata</i>       | Morton [1995b]              | Morton [1995b]                                                 |
| <i>Sminthopsis douglasi</i>            | Woolley [1995c]             | Woolley [1995c]                                                |
| <i>Sminthopsis griseoventer</i>        | Dickman [1995b]             | Dickman [1995b]                                                |
| <i>Sminthopsis hirtipes</i>            | pers comm Chris Dickman     | pers comm Chris Dickman                                        |
| <i>Sminthopsis leucopus</i>            | Lunney [1995]               | Lunney [1995]                                                  |
| <i>Sminthopsis macroura</i>            | Morton [1995a]              | Morton [1995a]                                                 |
| <i>Sminthopsis murina</i>              | Fox [1995]                  | Fox [1995]                                                     |
| <i>Sminthopsis virginiae</i>           | Woolley [1995e]             | Woolley [1995e]                                                |
| <i>Spilocuscus maculatus</i>           | Silva and Downing [1995]    | Silva and Downing [1995]                                       |
| <i>Spilocuscus rufoniger</i>           | Flannery [1990]             | Flannery [1990]                                                |
| <i>Tarsipes rostratus</i>              | Renfree [1995]              | Renfree [1995]                                                 |
| <i>Thylacinus cynocephalus</i>         | Paddle [2002]               |                                                                |
| <i>Thylamys elegans</i>                | Silva and Downing [1995]    | Silva and Downing [1995]                                       |
| <i>Thylogale billardieri</i>           | Johnson and Rose [1995]     | Johnson and Rose [1995]                                        |
| <i>Thylogale browni</i>                | Flannery [1990]             | Flannery [1990]                                                |
| <i>Thylogale brunii</i>                |                             | Flannery [1990]                                                |
| <i>Thylogale stigmatica</i>            | Johnson and Vernes [1995]   | Johnson and Vernes [1995]                                      |
| <i>Thylogale thetis</i>                | Johnson [1995b]             | Johnson [1995b]                                                |
| <i>Trichosurus caninus</i>             | Tyndale-Biscoe [1984]       | Tyndale-Biscoe [1984]                                          |
| <i>Trichosurus vulpecula</i>           | How and Kerle [1995]        | How and Kerle [1995]                                           |
| <i>Vombatus ursinus</i>                | McIlroy [1995]              | McIlroy [1995]                                                 |
| <i>Wallabia bicolor</i>                | Merchant [1995b]            | Merchant [1995b]                                               |
| <i>Wyulda squamicaudata</i>            | Burbidge [1995a]            | Burbidge [1995a]                                               |

## References

- Alonso-Mejia A, Medelin RA (1992): *Marmosa mexicana*. Mammalian Species 421:1-4.
- Aslin HJ, Lim L (1995): Kowari; in Strahan R (ed): The Australian Museum complete book of Australian Mammals. Sydney, Reed Books, pp 59-61.
- Benshemesh J (2008): Itjaritjari; in Van Dyck S, Strahan R (eds): The mammals of Australia. Sydney, The Queensland Museum and the Australian Museum, Reed Books, vol Third edition, pp 412-413.
- Bergallo HdG, Cerqueira R (1994): Reproduction and growth of the opossum *Monodelphis domestica* (Mammalia: Didelphidae) in northeastern Brazil. J Zool Lond 232:551-563.
- Bos DG, Carthew SM (2001): Population ecology of *Ningaui yvonneae* (Dasyuridae : Marsupialia) in the Middleback Ranges, Eyre Peninsula, South Australia. Wildl Res 28:507-515.
- Bradley AJ (1995): Red-tailed phascogale; in Strahan R (ed): The Australian Museum complete book of Australian Mammals. Sydney, Reed Books, pp 102-103.
- Braithwaite RW (1995a): Southern brown bandicoot; in Strahan R (ed): The Australian Museum complete book of Australian Mammals. Sydney, Reed Books, pp 176-177.
- Braithwaite RW (1995b): Brown antechinus; in Strahan R (ed): The Australian Museum complete book of Australian Mammals. Sydney, Reed Books, pp 95-97.
- Braithwaite RW, Begg RJ (1995): Northern quoll; in Strahan R (ed): The Australian Museum complete book of Australian Mammals. Sydney, Reed Books, pp 65-66.
- Broome LS (1995): Mountain pygmy-possum; in Strahan R (ed): The Australian Museum complete book of Australian Mammals. Sydney, Reed Books, pp 208-210.
- Burbidge AA (1995a): Scaly-tailed possum; in Strahan R (ed): The Australian Museum complete book of Australian Mammals. Sydney, Reed Books, pp 276-277.
- Burbidge AA (1995b): Burrowing Bettong; in Strahan R (ed): The Australian Museum complete book of Australian Mammals. Sydney, Reed Books, pp 289-291.
- Burbidge AA, Johnson PM (1995): Spectacled Hare-wallaby; in Strahan R (ed): The Australian Museum complete book of Australian Mammals. Sydney, Reed Books, pp 312-315.
- Burnett S, Crowther MS (2008): Subtropical antechinus; in Strahan SVDR (ed): The Australian Museum complete book of Australian Mammals. Sydney, Reed Books, pp 97-98.
- Calaby JH (1995a): Fawn antechinus; in Strahan R (ed): The Australian Museum complete book of Australian Mammals. Sydney, Reed Books, pp 85-86.
- Calaby JH (1995b): Antilopine Wallaroo; in Strahan R (ed): The Australian Museum complete book of Australian Mammals. Sydney, Reed Books, pp 324-325.
- Calaby JH (1995c): Red-necked wallaby; in Strahan R (ed): The Australian Museum complete book of Australian Mammals. Sydney, Reed Books, pp 350-352.
- Christensen P (1995a): Brush-tailed Bettong; in Strahan R (ed): The Australian Museum complete book of Australian Mammals. Sydney, Reed Books, pp 292-293.
- Christensen P (1995b): Western Brush Wallaby; in Strahan R (ed): The Australian Museum complete book of Australian Mammals. Sydney, Reed Books, pp 341-342.
- Dennis AJ, Johnson PM (1995): Rufous bettong; in Strahan R (ed): The Australian Museum complete book of Australian Mammals. Sydney, Reed Books, pp 285-287.
- Dickman CR (1995a): Agile antechinus; in Strahan R (ed): The Australian Museum complete book of Australian Mammals. Sydney, Reed Books, pp 100-101.
- Dickman CR (1995b): Grey-bellied dunnart; in Strahan R (ed): The Australian Museum complete book of Australian Mammals. Sydney, Reed Books, pp 139-140.
- Dickman CR (1995c): Dusky antechinus; in Strahan R (ed): The Australian Museum complete book of Australian Mammals. Sydney, Reed Books, pp 98-99.
- Edgar R, Belcher C (1995): Spotted-tailed quoll; in Strahan R (ed): The Australian Museum complete book of Australian Mammals. Sydney, Reed Books, pp 67-69.

- Edmunds RM, Goertz JW (1978): Age ratios, weights and reproduction of the Virginia opossum in north Louisiana. *J Mammalog* 59:884-885.
- Eldridge MDB, Close RL (1995a): Brush-tailed Rock-wallaby; in Strahan R (ed): The Australian Museum complete book of Australian Mammals. Sydney, Reed Books, pp 383-385.
- Eldridge MDB, Close RL (1995b): Godmans Rock-wallaby; in Strahan R (ed): The Australian Museum complete book of Australian Mammals. Sydney, Reed Books, pp 373-374.
- Eldridge MDB, Close RL (1995c): Mareeba Rock-wallaby; in Strahan R (ed): The Australian Museum complete book of Australian Mammals. Sydney, Reed Books, p 382.
- Eldridge MDB, Close RL (1995d): Herbert's Rock-wallaby; in Strahan R (ed): The Australian Museum complete book of Australian Mammals. Sydney, Reed Books, pp 374-375.
- Eldridge MDB, Close RL (1995e): Black-footed Rock-wallaby; in Strahan R (ed): The Australian Museum complete book of Australian Mammals. Sydney, Reed Books, pp 377-381.
- Eldridge MDB, Close RL (1995f): Unadorned Rock-wallaby; in Strahan R (ed): The Australian Museum complete book of Australian Mammals. Sydney, Reed Books, pp 376-377.
- Fisher DO, Lara MC (1999): Effects of body size and home range area on access to mates and paternity in male bridled naitail wallabies. *Anim Behav* 58:121-130.
- Fisher DO, Nuske S, Green S, Seddon JM, McDonald B (2011): The evolution of sociality in small, carnivorous marsupials: the lek hypothesis revisited. *Behav Ecol Sociobiol* 65:593-605.
- Flannery TF (1990): Mammals of New Guinea. Queensland: Robert Brown and Associates.
- Flannery TF (1995): Possums of the world. A monograph of the Phalangerioidea. Chatswood, NSW: Geo Productions Pty Ltd / The Australian Museum.
- Flannery TF, Martin R, Szalay A, Baer P (1996): Tree Kangaroos; a curious natural history. Sydney, Australia: Reed Books.
- Fox BJ (1995): Common dunnart; in Strahan R (ed): The Australian Museum complete book of Australian Mammals. Sydney, Reed Books, pp 150-151.
- Friend JA, Burbidge AA (1995): Western barred bandicoot; in Strahan R (ed): The Australian Museum complete book of Australian Mammals. Sydney, Reed Books, pp 178-180.
- Friend JA (1995): Numbat; in Strahan R (ed): The Australian Museum complete book of Australian Mammals. Sydney, Reed Books, pp 160-162.
- Godsell J (1995): Eastern quoll; in Strahan R (ed): The Australian Museum complete book of Australian Mammals. Sydney, Reed Books, pp 70-71.
- Gordon G (1995a): Rufous spiny bandicoot; in Strahan R (ed): The Australian Museum complete book of Australian Mammals. Sydney, Reed Books, pp 191-192.
- Gordon G (1995b): Northern brown bandicoot; in Strahan R (ed): The Australian Museum complete book of Australian Mammals. Sydney, Reed Books, pp 174-175.
- Green RH (1995): Little pygmy-possum; in Strahan R (ed): The Australian Museum complete book of Australian Mammals. Sydney, Reed Books, pp 215-216.
- Handasyde KA (2008): Striped possum; in Van Dyck S, Strahan R (eds): The mammals of Australia. Sydney, The Queensland Museum and the Australian Museum, Reed Books, vol Third edition, pp 224-225.
- Harder JD, Fleck DW (1997): Reproductive ecology of New World marsupials; in N.R S, Hinds LA (eds): Marsupial biology; recent research, new perspectives. Sydney, University of New South Wales Press, pp 175-203.
- Herskovitz P (1999): *Dromiciops gliroides* Thomas 1894, Last of the microbiotheria (Marsupialia), with an review of the family Microbiotheriidae. *Fieldiana Zool* 93.
- How RA, Kerle JA (1995): Common brushtail possum; in Strahan R (ed): The Australian Museum complete book of Australian Mammals. Sydney, Reed Books, pp 273-275.
- Hyde RL, Pernetta JC, Sernabe T (1984): Exploitation of wild animals. The Research Report of the Simbu Land Use Project, South Simbu in Studies in Demography, Nutrition and Subsistence. Port Moresby, IASER, vol 4, pp 291-380.

- Ingleby S, Gordon G (1995): Northern Nailtail Wallaby; in Strahan R (ed): The Australian Museum Complete Book of Australian Mammals. Sydney, Angus and Robertson, pp 361-362.
- Johnson KA, Burbidge AA (1995a): Rufous Hare-wallaby; in Strahan R (ed): The Australian Museum complete book of Australian Mammals. Sydney, Reed Books, pp 316-318.
- Johnson KA, Burbidge AA (1995b): Pig-footed bandicoot; in Strahan R (ed): The Australian Museum complete book of Australian Mammals. Sydney, Reed Books, pp 170-171.
- Johnson KA (1995a): Bilby; in Strahan R (ed): The Australian Museum complete book of Australian Mammals. Sydney, Reed Books, pp 186-188.
- Johnson KA, Rose R (1995): Tasmanian Pademelon; in Strahan R (ed): The Australian Museum complete book of Australian Mammals. Sydney, Reed Books, pp 394-396.
- Johnson KA (1995b): Red-Necked Pademelon; in Strahan R (ed): The Australian Museum complete book of Australian Mammals. Sydney, Reed Books, pp 399-400.
- Johnson PM (1995c): Whiptail wallaby; in Strahan R (ed): The Australian Museum complete book of Australian Mammals. Sydney, Reed Books, pp 344-346.
- Johnson PM (1995d): Lumholtz's Tree-kangaroo; in Strahan R (ed): The Australian Museum complete book of Australian Mammals. Sydney, Reed Books, pp 309-310.
- Johnson PM, Vernes KA (1995): Red-legged Pademelon; in Strahan R (ed): The Australian Museum complete book of Australian Mammals. Sydney, Reed Books, pp 397-398.
- Johnston PG (1995): Long-nosed potoroo; in Strahan R (ed): The Australian Museum complete book of Australian Mammals. Sydney, Reed Books, pp 301-302.
- Jones B (1995a): Western ringtail possum; in Strahan R (ed): The Australian Museum complete book of Australian Mammals. Sydney, Reed Books, pp 252-254.
- Jones KE, Bielby J, Cardillo M, Fritz SA, O'Dell J, Orme DL, Safi K, Sechrest W, Boakes EH, Carbone C, Connolly C, Cutts MJ, Foster JK, Grenyer R, Habib M, Plaster CA, Price SA, Rigby EA, Rist J, Teacher A, Bininda-Emonds ORP, Gittleman JL, Mace GM, Purvis A (2009): PanTHERIA: A species-level database of life-history, ecology and geography of extant and recently extinct mammals. *Ecology* 90:2648-2648.
- Jones M (1995b): Tasmanian devil; in Strahan R (ed): The Australian Museum complete book of Australian Mammals. Sydney, Reed Books, pp 82-84.
- Kerle JA, Winter JW (1995): Rock ringtail possum; in Strahan R (ed): The Australian Museum complete book of Australian Mammals. Sydney, Reed Books, pp 242-243.
- Kirkpatrick TH (1995): Black-striped Wallaby; in Strahan R (ed): The Australian Museum complete book of Australian Mammals. Sydney, Reed Books, pp 327-328.
- Kirsch JAW, Waller PF (1979): Notes on the trapping and behavior of the Caenolestidae (Marsupialia). *J Mammalog* 60:390-395.
- Kitchener DJ (1995): Quokka; in Strahan R (ed): The Australian Museum complete book of Australian Mammals. Sydney, Reed Books, pp 401-403.
- Leung LK-P (1995): Cinnamon antechinus; in Strahan R (ed): The Australian Museum complete book of Australian Mammals. Sydney, Reed Books, pp 91-92.
- Lunney D (1995): White-footed dunnart; in Strahan R (ed): The Australian Museum complete book of Australian Mammals. Sydney, Reed Books, pp 143-145.
- Lyne AG (1964): Observations on the breeding and growth of the marsupial *Perameles nasuta* Geoffroy, with notes on other bandicoots. *Aust J Zool* 12:322-339.
- Martin RW, Handasyde KA (1995): Koala; in Strahan R (ed): The Australian Museum complete book of Australian Mammals. Sydney, Reed Books, pp 196-198.
- Martin RW, Johnson PM (1995): Bennett's Tree-kangaroo; in Strahan R (ed): The Australian Museum complete book of Australian Mammals. Sydney, Reed Books, pp 307-308.
- Maynes G (1995): Parma Wallaby; in Strahan R (ed): The Australian Museum complete book of Australian Mammals. Sydney, Reed Books, pp 342-344.
- McIlroy JC (1995): Common wombat; in Strahan R (ed): The Australian Museum complete book of Australian Mammals. Sydney, Reed Books, pp 205-206.

- McKay GM (1995): Greater glider; in Strahan R (ed): The Australian Museum complete book of Australian Mammals. Sydney, Reed Books, pp 240-241.
- McKay GM, Ong P (2008): Common ringtail possum; in Van Dyck S, Strahan R (eds): The mammals of Australia. Sydney, The Queensland Museum and the Australian Museum, Reed Books, vol Third edition, pp 255-256.
- McKenzie NL, Dickman CR (1995): Wongai ningai; in Strahan R (ed): The Australian Museum complete book of Australian Mammals. Sydney, Reed Books, pp 116-117.
- Merchant JC (1995a): Agile Wallaby; in Strahan R (ed): The Australian Museum complete book of Australian Mammals. Sydney, Reed Books, pp 322-323.
- Merchant JC (1995b): Swamp Wallaby; in Strahan R (ed): The Australian Museum complete book of Australian Mammals. Sydney, Reed Books, pp 404-405.
- Morton SR (1995a): Stripe-faced dunnart; in Strahan R (ed): The Australian Museum complete book of Australian Mammals. Sydney, Reed Books, pp 148-149.
- Morton SR (1995b): Fat-tailed dunnart; in Strahan R (ed): The Australian Museum complete book of Australian Mammals. Sydney, Reed Books, pp 129-131.
- Newell GR (1999): Home range and habitat use by Lumholtz's tree-kangaroo (*Dendrolagus lumholtzi*) within a rainforest fragment in north Queensland. Wildl Res 26:129-145.
- Newsome AE (1995): Red kangaroo; in Strahan R (ed): The Australian Museum complete book of Australian Mammals. Sydney, Reed Books, pp 353-355.
- Norris CA (1999): Phalanger lullulae. Mammalian Species 620:1-4.
- Paddle R (2002): The last tasmanian tiger : the history and extinction of the Thylacine. Cambridge: Cambridge University Press.
- Pine RH (1979): Taxonomic notes on *Monodelphis dimidiata itatiayae* (Miranda-Ribeiro), *Monodelphis domestica* (Wagner) and *Monodelphis maraxina* (Thomas) (Mammalia, Marsupialia, Didelphidae). Mammalia 43:495-499.
- Poole WE (1995a): Western Grey Kangaroo; in Strahan R (ed): The Australian Museum complete book of Australian Mammals. Sydney, Reed Books, pp 332-334.
- Poole WE (1995b): Eastern Grey Kangaroo; in Strahan R (ed): The Australian Museum complete book of Australian Mammals. Sydney, Reed Books, pp 335-338.
- Poole WE (1995c): Wallaroo; in Strahan R (ed): The Australian Museum complete book of Australian Mammals. Sydney, Reed Books, pp 347-349.
- Prince RIT (1995): Banded Hare-Wallaby; in Strahan R (ed): The Australian Museum complete book of Australian Mammals. Sydney, Reed Books, pp 406-408.
- Read D (1995a): Gile's planigale; in Strahan R (ed): The Australian Museum complete book of Australian Mammals. Sydney, Reed Books, pp 107-109.
- Read DG (1995b): Narrow-nosed planigale; in Strahan R (ed): The Australian Museum complete book of Australian Mammals. Sydney, Reed Books, pp 113-115.
- Redford KH, Eisenberg JF (1992): Mammals of the Neotropics, the southern cone: Chile, Argentina, Uruguay, Paraguay. Chicago: University of Chicago Press.
- Redhead TD (1995): Common planigale; in Strahan R (ed): The Australian Museum complete book of Australian Mammals. Sydney, Reed Books, pp 111-112.
- Renfree MB (1995): Honey possum; in Strahan R (ed): The Australian Museum complete book of Australian Mammals. Sydney, Reed Books, pp 258-260.
- Rose R, Johnson KA (1995): Tasmanian Bettong; in Strahan R (ed): The Australian Museum complete book of Australian Mammals. Sydney, Reed Books, pp 287-288.
- Sanson GD (1995): Narbalek; in Strahan R (ed): The Australian Museum complete book of Australian Mammals. Sydney, Reed Books, pp 371-372.
- Seebeck JH (1995): Eastern barred bandicoot; in Strahan R (ed): The Australian Museum complete book of Australian Mammals. Sydney, Reed Books, pp 182-183.
- Serena M, Soderquist T (1995): Western quoll; in Strahan R (ed): The Australian Museum complete book of Australian Mammals. Sydney, Reed Books, pp 62-64.



- Sharman GB, Maynes GM, Eldridge MDB, Close RL (1995a): Short-Eared Rock-Wallaby; in Strahan R (ed): The Australian Museum complete book of Australian Mammals. Sydney, Reed Books, pp 367-368.
- Sharman GB, Maynes GM, Eldridge MDB, Close RL (1995b): Proserpine Rock-Wallaby; in Strahan R (ed): The Australian Museum complete book of Australian Mammals. Sydney, Reed Books, pp 386-387.
- Sharman GB, Maynes GM, Eldridge MDB, Close RL (1995c): Yellow-Footed Rock-Wallaby; in Strahan R (ed): The Australian Museum complete book of Australian Mammals. Sydney, Reed Books, pp 391-393.
- Silva M, Downing JA (1995): CRC handbook of mammalian body masses. New York: CRC Press.
- Smith AP (1995a): Leadbeater's possum; in Strahan R (ed): The Australian Museum complete book of Australian Mammals. Sydney, Reed Books, pp 224-226.
- Smith MJ, Hinds L (1995): Tammar Wallaby; in Strahan R (ed): The Australian Museum complete book of Australian Mammals. Sydney, Reed Books, pp 329-331.
- Smith MJ (1995b): Western pygmy-possum; in Strahan R (ed): The Australian Museum complete book of Australian Mammals. Sydney, Reed Books, pp 213-214.
- Soderquist T (1995): Brush-tailed phascogale; in Strahan R (ed): The Australian Museum complete book of Australian Mammals. Sydney, Reed Books, pp 104-106.
- Suckling GC (1995a): Squirrel glider; in Strahan R (ed): The Australian Museum complete book of Australian Mammals. Sydney, Reed Books, pp 234-235.
- Suckling GC (1995b): Sugar glider; in Strahan R (ed): The Australian Museum complete book of Australian Mammals. Sydney, Reed Books, pp 229-231.
- Turner V, Ward SJ (1995): Eastern pygmy-possum; in Strahan R (ed): The Australian Museum complete book of Australian Mammals. Sydney, Reed Books, pp 217-218.
- Tyndale-Biscoe CH (1984): Reproductive physiology of possums and gliders; in Smith A, Hume ID (eds): Possums and gliders. Canberra, Surrey Beatty and Sons Pty Ltd, pp 89-106.
- Valente A (1995): Kultarr; in Strahan R (ed): The Australian Museum complete book of Australian Mammals. Sydney, Reed Books, pp 121-122.
- Van Dyck SM (1995a): Yellow-footed antechinus; in Strahan R (ed): The Australian Museum complete book of Australian Mammals. Sydney, Reed Books, pp 86-88.
- Van Dyck SM (1995b): Ingram's planigale; in Strahan R (ed): The Australian Museum complete book of Australian Mammals. Sydney, Reed Books, pp 110-111.
- Wainer JW, Wilson BA (1995): Swamp antechinus; in Strahan R (ed): The Australian Museum complete book of Australian Mammals. Sydney, Reed Books, pp 93-94.
- Wells RT (1995): Southern-hairy-nosed wombat; in Strahan R (ed): The Australian Museum complete book of Australian Mammals. Sydney, Reed Books, pp 202-203.
- White JP (2004): Where the wild things are: prehistoric animal translocation in the circum New Guinea archipelago; in Fitzpatrick S (ed): Voyages of discovery: the archaeology of islands. Westport, US, Praeger Publishers, pp 147-164.
- Winter J, Leung L (2008): Southern common cuscus; in Van Dyck S, Strahan R (eds): The mammals of Australia. Sydney, The Queensland Museum and the Australian Museum, Reed Books, vol Third edition, pp 268-269.
- Winter JW, Johnson PM (1995): Northern bettong; in Strahan R (ed): The Australian Museum complete book of Australian Mammals. Sydney, Reed Books, pp 294-295.
- Winter JW, Goudberg NJ (1995a): Lemuroid ringtail possum; in Strahan R (ed): The Australian Museum complete book of Australian Mammals. Sydney, Reed Books, pp 238-239.
- Winter JW, Goudberg NJ (1995b): Herbert river ringtail possum; in Strahan R (ed): The Australian Museum complete book of Australian Mammals. Sydney, Reed Books, pp 250-252.
- Winter JW, Goudberg NJ (1995c): Green ringtail possum; in Strahan R (ed): The Australian Museum complete book of Australian Mammals. Sydney, Reed Books, pp 245-246.

- Woodside DP (1995): Feathertail glider; in Strahan R (ed): The Australian Museum complete book of Australian Mammals. Sydney, Reed Books, pp 262-264.
- Woolley P (1995a): Fat-tailed pseudantechinus; in Strahan R (ed): The Australian Museum complete book of Australian Mammals. Sydney, Reed Books, pp 76-77.
- Woolley P (1995b): Little red kaluta; in Strahan R (ed): The Australian Museum complete book of Australian Mammals. Sydney, Reed Books, pp 57-58.
- Woolley PA (1995c): Julia creek dunnart; in Strahan R (ed): The Australian Museum complete book of Australian Mammals. Sydney, Reed Books, pp 133-135.
- Woolley PA (1995d): Southern dibbler; in Strahan R (ed): The Australian Museum complete book of Australian Mammals. Sydney, Reed Books, pp 72-73.
- Woolley PA, Begg RJ (1995): Northern dibbler; in Strahan R (ed): The Australian Museum complete book of Australian Mammals. Sydney, Reed Books, pp 74-75.
- Woolley PA (1995e): Red-cheeked dunnart; in Strahan R (ed): The Australian Museum complete book of Australian Mammals. Sydney, Reed Books, pp 156-157.
- Woolley PA (2003): Reproductive biology of some dasyurid marsupials of New Guinea; in Jones M.E. DCR, Archer M. (ed): Predators with pouches: the biology of carnivorous marsupials. Melbourne, CSIRO Publishing, pp 169-182.
- Woolley PA (2008): Brush-tailed mulgara; in Van Dyck S, Strahan R (eds): The mammals of Australia. Sydney, The Queensland Museum and the Australian Museum, Reed Books, vol Third edition, pp 47-48.
